# Supplementary material for: Rational synthesis of Pt-based dandelion-like yolk–shell nanoparticles with enhanced oxygen reduction properties
Source: Royal Society of Chemistry journal article supplement (doi:10.1039/c9se00618d), 2019-01-01
Supplement: c9se00618d1.pdf [file c9se00618d1.pdf]

Electronic Supplementary Information

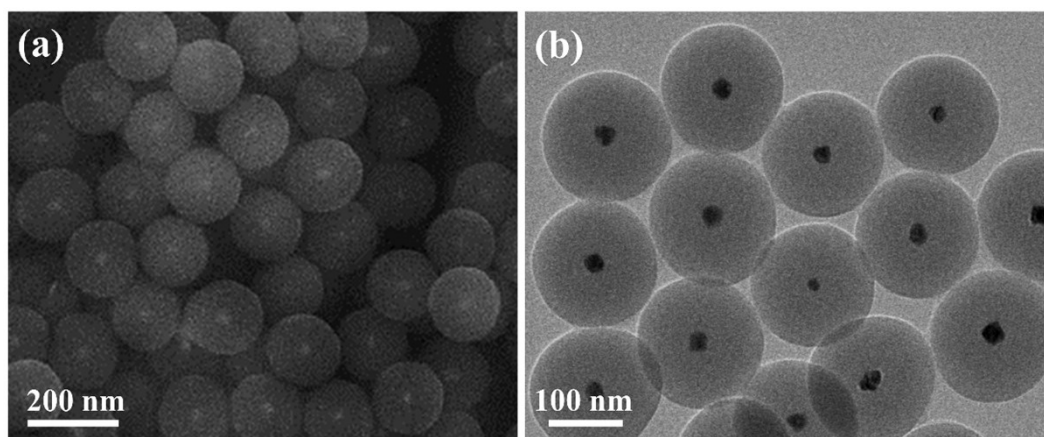

**Fig. S1** SEM (a) and TEM (b) images of Pd@SiO<sub>2</sub> nanoparticles.

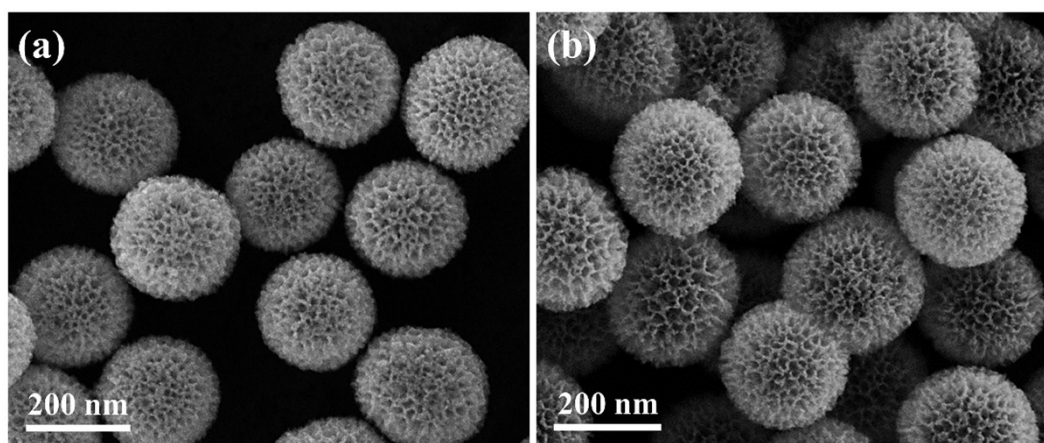

**Fig. S2** SEM images of Pd@SiO<sub>2</sub>@PtPd nanoparticles before etching (a) and Pd@PtPd DYSNs after etching (b).

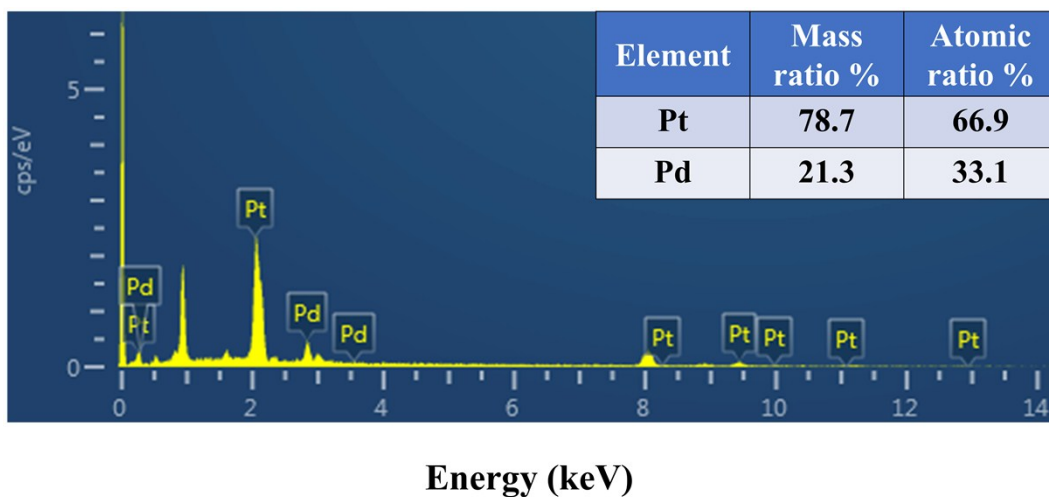

**Fig. S3** EDX spectrum of the Pd@PtPd DYSNs.

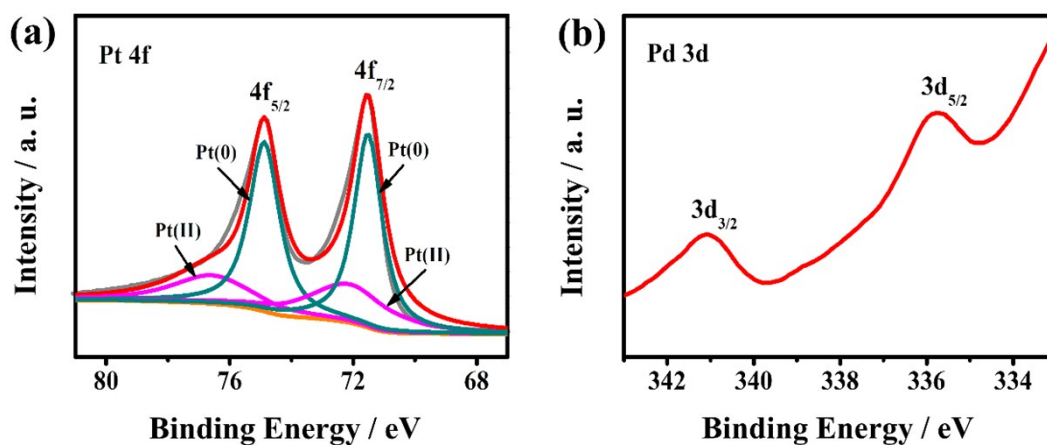

**Fig. S4** XPS spectra of Pt 4f (a) and Pd 3d (b) regions for the Pd@PtPd DYSNs.

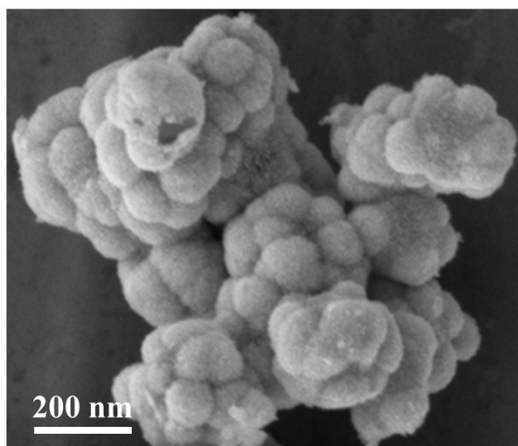

**Fig. S5** SEM image of the sample prepared in the typical condition without F127.

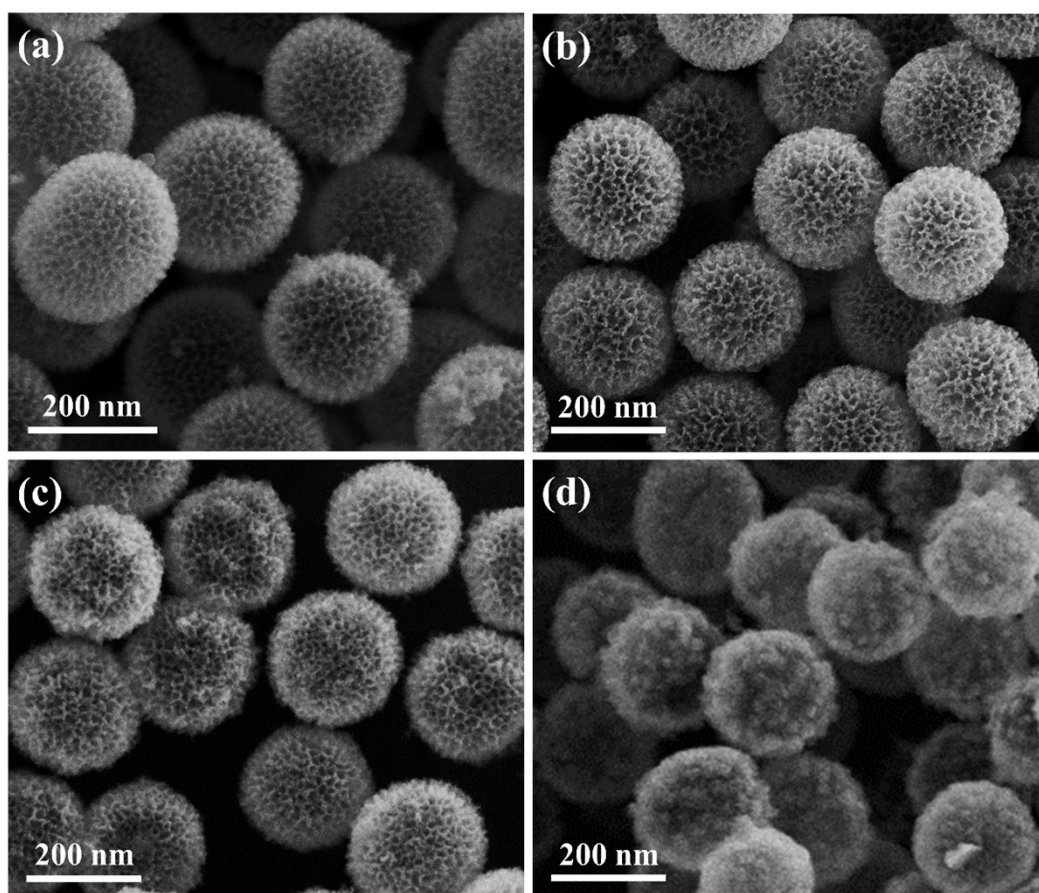

**Fig. S6** SEM images of the samples with different ratio of Pt and Pd precursors: (a) Pd@Pt, only  $\text{K}_2\text{PtCl}_4$  was added. (b) Pd@PtPd DYSNs,  $\text{K}_2\text{PtCl}_4/\text{Na}_2\text{PdCl}_4 = 3/1$ . (c) Pd@Pt<sub>2</sub>Pd<sub>2</sub>,  $\text{K}_2\text{PtCl}_4/\text{Na}_2\text{PdCl}_4 = 2/2$ . (d) Pd@Pt<sub>1</sub>Pd<sub>3</sub>,  $\text{K}_2\text{PtCl}_4/\text{Na}_2\text{PdCl}_4 = 1/3$ .

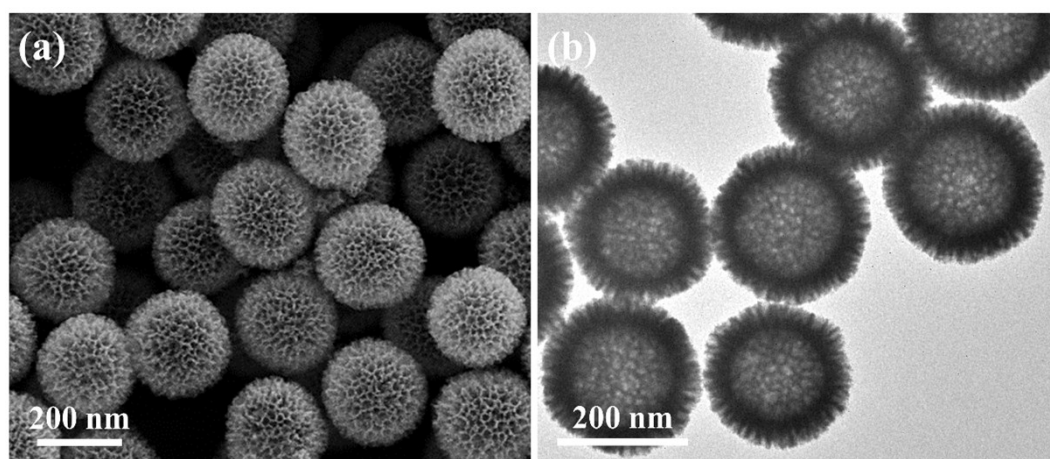

**Fig. S7** SEM (a) and TEM (b) images of the PtPd DHNs.

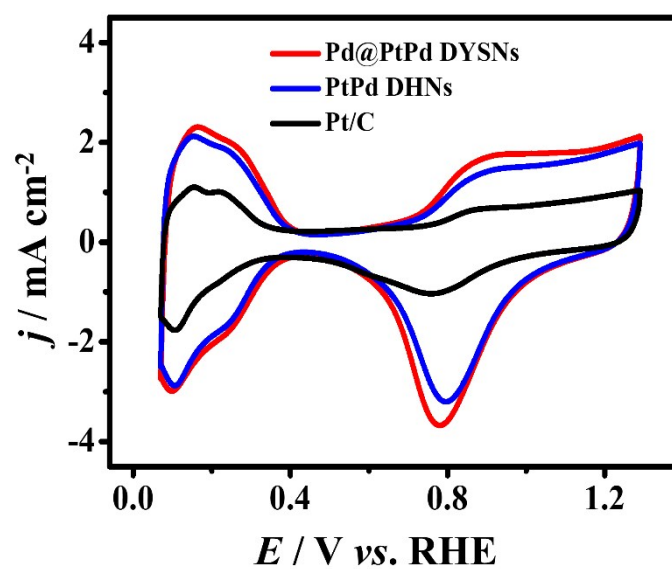

**Fig. S8** Cyclic voltammetry curves of Pd@PtPd DYSNs, PtPd DHNs and Pt/C in  $\text{N}_2$ -saturated 0.1 M  $\text{HClO}_4$  solution at room temperature.
